# Supplementary material
Source: publisher site journal article supplement (https://www.dovepress.com/article/389562)

**Appendix 1: Search strategy**

1. “gestational diabetes” OR “Diabetes, Pregnancy-Induced” OR “Diabetes, Pregnancy Induced” OR “Pregnancy-Induced Diabetes” OR “Diabetes Mellitus, Gestational” OR “Gestational Diabetes Mellitus” OR “Pregnancy in Diabet*” OR GDM OR “Pregnan* diabetes” OR “Pregnan* DM”

2. "life style" OR “Life Styles” OR Lifestyle OR Lifestyles OR behavior* OR behaviour*

3. activit* OR movement OR motion* OR exerci* OR gait* OR step OR steps OR walk* OR Ambulation OR fitness

4. diet OR diets OR dieting OR eating OR Food OR Nutrition

5. 2 OR 3 OR 4

6. smartphone OR mobile phone OR cell phone OR app OR applications

7. short message service OR short message OR text message OR SMS

8. iOS* OR android*

9. 6 OR 7 OR 8

10. Clinical Trials OR Randomized Trials OR Randomized Clinical Controlled Clinical Trials OR Randomized OR RCTs

12. 1 AND 5 AND 9 AND 10

Appendix 2: The details on the risk of bias (graph).


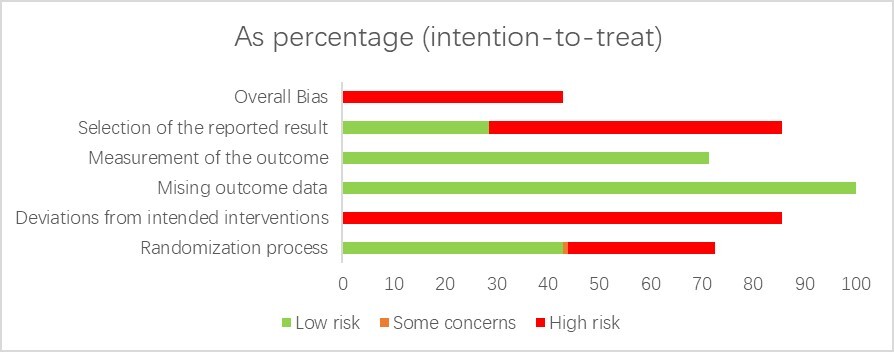


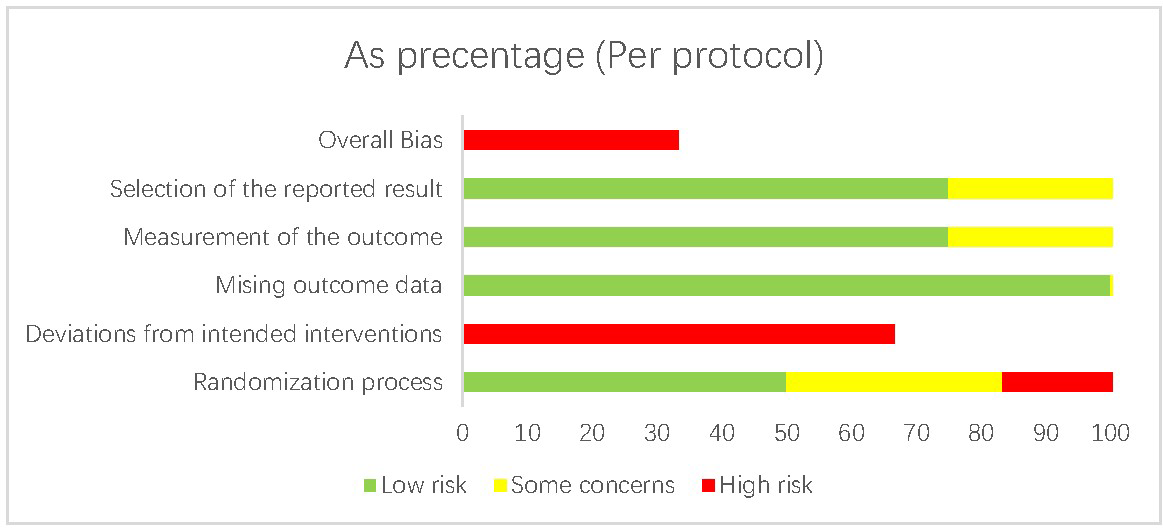

Supplement: Supplementary file 1 [file get_supplementary_file.php]
